# Supplementary material
Source: Royal Society of Chemistry journal article supplement (doi:10.1039/d5fb00926j)
Supplement: d5fb00926j2.pdf [file d5fb00926j2.pdf]

### Figure Legends

Table. S1. Differential metabolites identified in *L. monocytogenes* by pairwise OPLS-DA comparisons of the control with US, LVA, and US\_LVA treatments.

Table. S2. Validation of LVA neutralization efficacy and host-cell cytotoxicity.

Fig. S1. Permutation test validation of the pairwise OPLS-DA models in *L. monocytogenes*: (A) Control vs US, (B) Control vs LVA, and (C) Control vs US\_LVA.
