# Supplementary material
Source: Royal Society of Chemistry journal article supplement (doi:10.1039/d5fb00926j)
Supplement: d5fb00926j3.pdf [file d5fb00926j3.pdf]

Table. S1. Differential metabolites identified in *L. monocytogenes* by pairwise OPLS-DA comparisons of the control with US, LVA, and US\_LVA treatments.

| <b>Metabolites</b>       | <b>VIP</b> | <b>FC</b> | <b>P-value</b> | <b>q-value</b> |
|--------------------------|------------|-----------|----------------|----------------|
| <b>Control vs US</b>     |            |           |                |                |
| Ethanol                  | 4.31       | 0.22      | 0.00           | 0.01           |
| Threonate                | 2.94       | 0.50      | 0.00           | 0.00           |
| Xylitol                  | 2.52       | 0.59      | 0.00           | 0.02           |
| Methanol                 | 2.03       | 0.70      | 0.01           | 0.05           |
| Pyroglutamate            | 1.89       | 1.34      | 0.00           | 0.01           |
| Glycerol                 | 1.86       | 0.75      | 0.00           | 0.02           |
| Erythritol               | 1.73       | 0.76      | 0.01           | 0.09           |
| Homocysteine             | 1.73       | 1.29      | 0.00           | 0.02           |
| D-Threitol               | 1.73       | 0.78      | 0.00           | 0.02           |
| Biotin                   | 1.38       | 1.18      | 0.01           | 0.07           |
| Aspartate                | 1.19       | 1.14      | 0.02           | 0.03           |
| Ethylene glycol          | 1.13       | 1.13      | 0.04           | 0.06           |
| Lactate                  | 1.11       | 1.13      | 0.04           | 0.06           |
| Thymol                   | 1.10       | 0.90      | 0.01           | 0.09           |
| Glycolate                | 1.00       | 1.10      | 0.04           | 0.06           |
| <b>Control vs LVA</b>    |            |           |                |                |
| Succinate                | 3.10       | 0.29      | 0.00           | 0.00           |
| Proline                  | 2.39       | 2.07      | 0.00           | 0.00           |
| Tartrate                 | 2.25       | 1.91      | 0.00           | 0.00           |
| Glutamine                | 2.22       | 0.53      | 0.00           | 0.00           |
| Biotin                   | 2.16       | 0.55      | 0.00           | 0.00           |
| Arginine                 | 2.04       | 1.70      | 0.00           | 0.00           |
| Adipate                  | 2.03       | 0.59      | 0.00           | 0.00           |
| Cystathionine            | 1.78       | 0.67      | 0.00           | 0.00           |
| Pipecolate               | 1.74       | 0.68      | 0.00           | 0.00           |
| Ethylene glycol          | 1.71       | 1.45      | 0.00           | 0.00           |
| Histamine                | 1.66       | 0.70      | 0.00           | 0.00           |
| Glucitol                 | 1.55       | 1.38      | 0.01           | 0.02           |
| Succinylacetone          | 1.29       | 0.80      | 0.00           | 0.00           |
| Lactate                  | 1.25       | 1.23      | 0.00           | 0.01           |
| Xylose                   | 1.22       | 1.21      | 0.00           | 0.01           |
| Butanone                 | 1.18       | 0.84      | 0.00           | 0.00           |
| Glycolate                | 1.15       | 1.19      | 0.00           | 0.01           |
| Alloisoleucine           | 1.13       | 1.19      | 0.00           | 0.01           |
| Homocitrulline           | 1.09       | 1.17      | 0.00           | 0.00           |
| Propionate               | 1.05       | 0.87      | 0.00           | 0.00           |
| <b>Control vs US_LVA</b> |            |           |                |                |
| Guanidinosuccinate       | 3.12       | 0.21      | 0.00           | 0.00           |
| Aspartate                | 2.43       | 0.40      | 0.00           | 0.00           |

|                 |      |      |      |      |
|-----------------|------|------|------|------|
| Proline         | 2.16 | 2.07 | 0.00 | 0.00 |
| Cystathionine   | 2.02 | 0.53 | 0.00 | 0.00 |
| Tartrate        | 1.98 | 1.86 | 0.00 | 0.00 |
| Acetone         | 1.87 | 0.58 | 0.00 | 0.00 |
| Arginine        | 1.85 | 1.70 | 0.00 | 0.00 |
| Agmatine        | 1.76 | 1.69 | 0.01 | 0.02 |
| Isopropanol     | 1.65 | 0.66 | 0.00 | 0.00 |
| Ethylene glycol | 1.51 | 1.43 | 0.00 | 0.00 |
| Glucitol        | 1.40 | 1.38 | 0.01 | 0.02 |
| Histidine       | 1.37 | 0.75 | 0.00 | 0.00 |
| Methylamine     | 1.35 | 0.75 | 0.00 | 0.00 |
| Butanone        | 1.18 | 0.81 | 0.00 | 0.00 |
| Valerate        | 1.16 | 0.81 | 0.00 | 0.00 |
| Xylose          | 1.15 | 1.25 | 0.01 | 0.02 |
| Lactate         | 1.13 | 1.23 | 0.00 | 0.01 |
| Propionate      | 1.06 | 0.84 | 0.00 | 0.00 |
| Glycolate       | 1.05 | 1.19 | 0.00 | 0.00 |

---
