# Supplementary material
Source: Royal Society of Chemistry journal article supplement (doi:10.1039/d5fb00926j)
Supplement: d5fb00926j4.pdf [file d5fb00926j4.pdf]

Table. S2. Validation of LVA neutralization efficacy and host-cell cytotoxicity.

| Strain / Virus                      | Recovery in PBS control<br>(log units) | Recovery in neutralized LVA<br>(log units) | Cytotoxicity |
|-------------------------------------|----------------------------------------|--------------------------------------------|--------------|
| <i>E. coli</i> (ATCC 25922)         | 6.8 ± 0.2                              | 6.8 ± 0.1                                  | /            |
| <i>E. coli</i> O157:H7 (ATCC 35150) | 6.9 ± 0.1                              | 6.8 ± 0.1                                  | /            |
| <i>S. Typhimurium</i> (ATCC 14028)  | 6.8 ± 0.1                              | 6.6 ± 0.1                                  | /            |
| <i>S. Enteritidis</i> (ATCC 13076)  | 6.7 ± 0.1                              | 6.6 ± 0.1                                  | /            |
| <i>L. monocytogenes</i>             | 6.8 ± 0.1                              | 6.7 ± 0.1                                  | /            |
| MS2 bacteriophage                   | 6.9 ± 0.1                              | 6.8 ± 0.1                                  | Not observed |
| Tulane virus                        | 6.8 ± 0.1                              | 6.7 ± 0.1                                  | Not observed |

Notes: Microbial and viral recoveries are expressed as log CFU/mL for bacteria, log PFU/mL for MS2, and log TCID<sub>50</sub>/mL for Tulane virus. Data represent the mean ± SD (n = 3).
