# Supplementary material
Source: Royal Society of Chemistry journal article supplement (doi:10.1039/d5fb00926j)

**A**

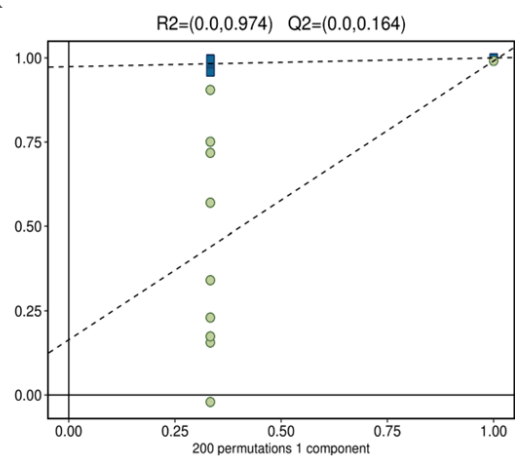

Control vs US

**B**

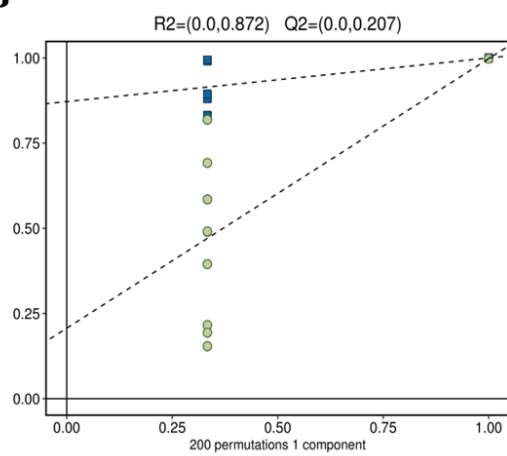

Control vs LVA

**C**

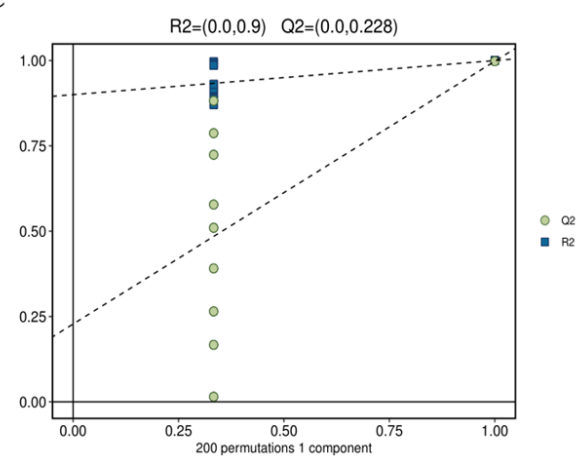

Control vs US\_LVA

Supplement: d5fb00926j1.pdf [file d5fb00926j1.pdf]
